# Supplementary material for: Graph-based pangenomics maximizes genotyping density and reveals structural impacts on fungal resistance in melon
Source: PubMed Central journal article supplement (PMC9780226; doi:10.1038/s41467-022-35621-7), 2022-12-22
Supplement: 41467_2022_35621_MOESM3_ESM.pdf [file 41467_2022_35621_MOESM3_ESM.pdf]

## **Description of Additional Supplementary Files**

**Supplementary Data 1:** Gaps in one genome relative to another for pairwise comparisons between all genomes in graph. 'N's are counted as gaps if aligned with an explicit base.

**Supplementary Data 2:** Primer specifications for *fom2* structural variation confirmation.
